# Supplementary material for: Investigating the lignocellulolytic gut microbiome of huhu grubs (Prionoplus reticularis) using defined diets and dietary switch
Source: PeerJ journal article supplement (doi:10.7717/peerj.17597), 2024-07-02

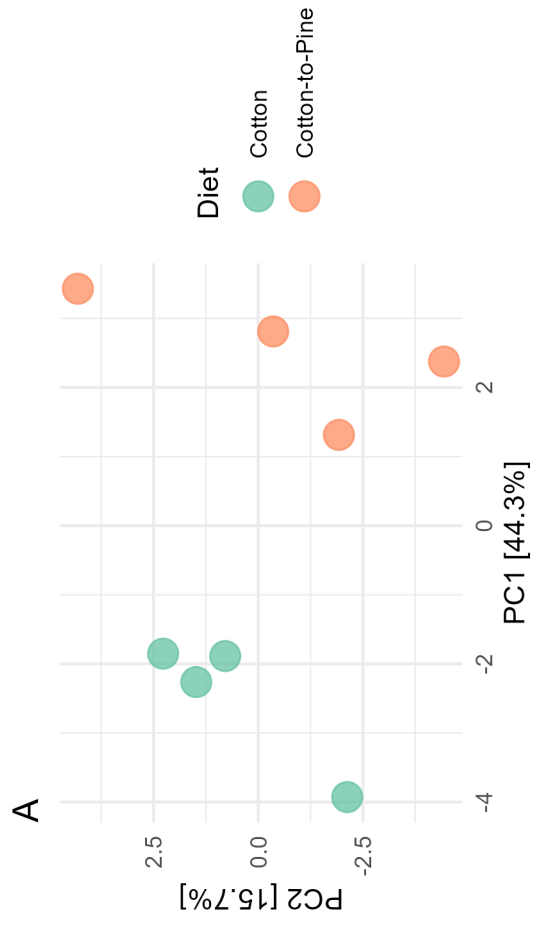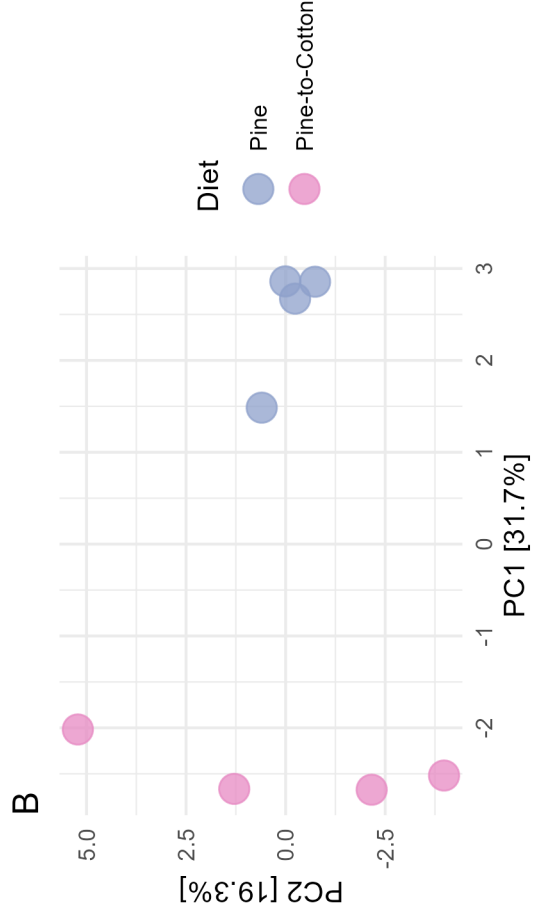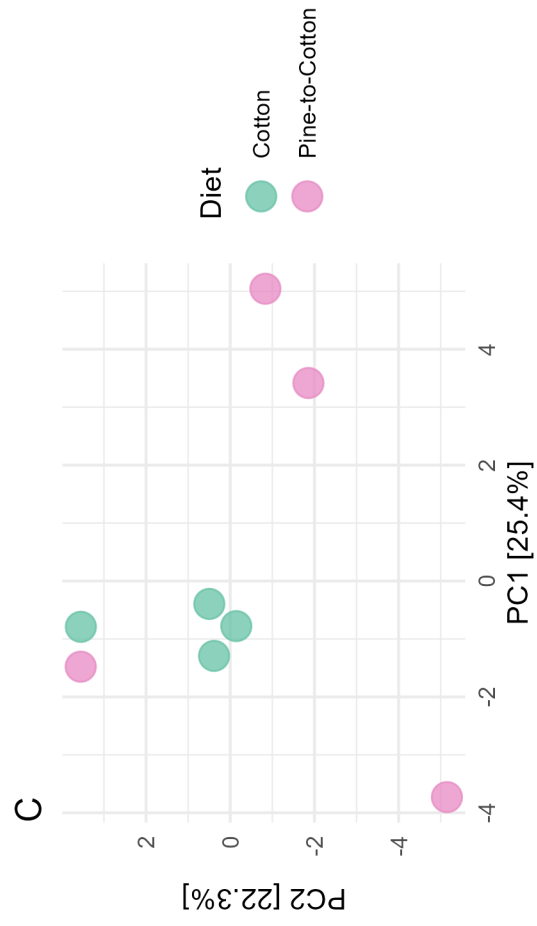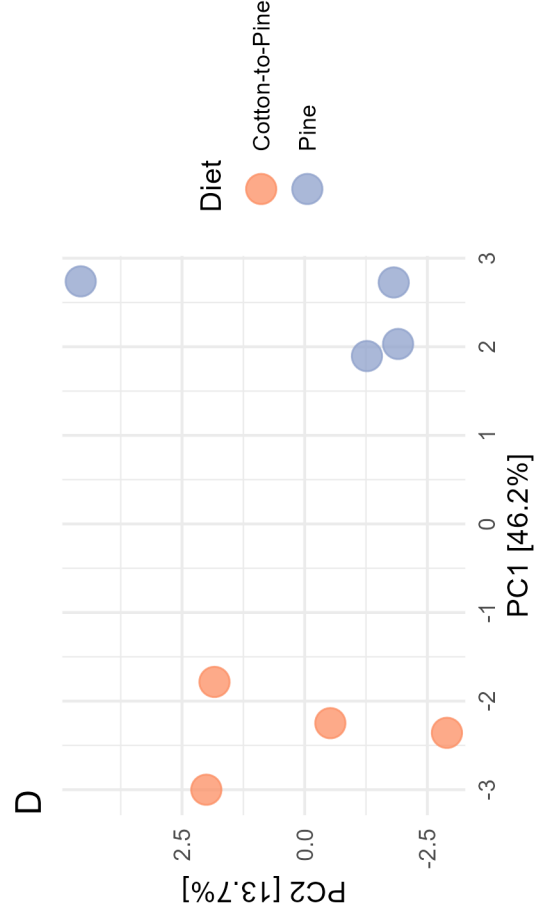

Supplement: Supp_Figure_2.pdf [file Supp_Figure_2.pdf]
